# Replication and Identification of Novel Variants at *TCF7L2* Associated with Type 2 Diabetes in Hong Kong Chinese

Maggie C. Y. Ng, Claudia H. T. Tam, Vincent K. L. Lam, Wing-Yee So, Ronald C. W. Ma, and Juliana C. N. Chan

Department of Medicine and Therapeutics (M.C.Y.N., C.H.T.T., V.K.L.L., W.-Y.S., R.C.W.M., J.C.N.C.) and Li Ka Shing Institute of Health Sciences (J.C.N.C.), The Chinese University of Hong Kong, Prince of Wales Hospital, Shatin, Hong Kong SAR, China

**Objective:** Variations at a large linkage disequilibrium (LD) block of transcription factor 7-like 2 gene (*TCF7L2*) were reported to be associated with type 2 diabetes (T2D) in Icelandic, Danish and European-American populations and further replicated in other populations of European, African, and Asian ancestries. However, data for Chinese and comprehensive survey of the whole gene are lacking.

**Design:** We attempted to examine 22 tagging single-nucleotide polymorphisms (SNPs) spanning across the *TCF7L2* gene for association with T2D in Hong Kong Chinese. We first studied a case-control sample involving 433 hospital cases with familial early-onset T2D and 419 normal controls and further studied the associated SNPs in 450 members of 142 diabetic families.

**Results:** Two of the previously reported risk alleles at rs11196205 (C) and rs7903146 (T) were rare in Chinese (0.013 and 0.024, respectively,

in controls). Rs11196205 was associated with T2D [odds ratio (OR) [95% confidence interval (CI)] = 2.11 (1.04–4.26)], whereas the association for rs7903146 [OR (95% CI) = 1.27 (0.71–2.29)] was not significant in the case-control sample. Interestingly, another SNP (rs11196218 G allele) located in adjacent LD block conferred independent risk for T2D [OR (95% CI) = 1.43 (1.14–1.79)] and contributed high-population attributable risk of 42%. The association finding of rs11196218 and its haplotype for T2D was also replicated in the family sample ( $P < 0.05$ ).

**Conclusions:** Our results are consistent with others' findings that variations at *TCF7L2* contribute to T2D, including Chinese. The presence of association signals spanning several LD blocks warrants further examination of extended regions to reveal the causal variant(s) for this important T2D gene. (*J Clin Endocrinol Metab* 92: 3733–3737, 2007)

TRANSCRIPTION FACTOR 7-LIKE 2 (*TCF7L2*) has recently been implicated in the pathogenesis of type 2 diabetes (T2D) through regulation of pancreatic  $\beta$ -cell insulin secretion. The *TCF7L2* gene at chromosome 10q25 was first reported to be associated with T2D in Icelandic, Danish, and European-American populations (1). The associated single-nucleotide polymorphisms (SNPs) were clustered within a single large linkage disequilibrium (LD) block of 92.1kb spanning intron 3 and intron 4 of *TCF7L2* and were subsequently replicated in populations of European, African, and Asian ancestries (2–11). The at-risk alleles were likely associated with lower anthropometric index (12, 13) and lower insulin secretion capacity in healthy and/or diabetic subjects (2, 3, 9, 13–16).

Whereas most replication studies focus on the SNPs within a single LD block, Lehman *et al.* recently found the association signals extended to 5' and 3' of the reported LD block

in Mexican-Americans (8). In this study, we attempted to study tagging SNPs spanning across the *TCF7L2* gene to confirm previous associations as well as to detect novel regions for association with T2D. We studied 22 SNPs in a case-control sample from Hong Kong including 433 hospital cases with familial early-onset type 2 diabetes and 419 normal controls. The associated SNPs were further replicated in 450 members of 142 diabetic families recruited from the Hong Kong Family Diabetes Study.

## Subjects and Methods

### Subjects

All subjects were of southern Han Chinese ancestry residing in Hong Kong. The study included individuals from three independent samples. The first sample (cases) consisted of 433 unrelated T2D patients selected from the Hong Kong Diabetes Registry (17). All patients were early-onset (diagnosed  $\leq 40$  yr) with positive family history of diabetes in first-degree relatives. The second sample (controls) consisted of 419 normal control subjects [fasting plasma glucose (FPG)  $< 6.1$  mmol/liter] recruited from the general population participating in a community-based cardiovascular risk screening program as well as hospital staff. The third sample (families) included 142 families consisting of probands, siblings, and parents (450 subjects, 266 diabetics, average family size  $3.2 \pm 1.1$ ) recruited from the Hong Kong Family Diabetes Study. The details of ascertainment, exclusion criteria, and phenotyping of the families are described elsewhere (18). The clinical characteristics of subjects in the three samples are summarized in Table 1. Informed consent was obtained for each participating subject. This study was approved by the Clinical Research Ethics Committee of the Chinese University of Hong Kong.

First Published Online July 3, 2007

Abbreviations: BMI, Body mass index; CHB, Han Chinese; CI, confidence interval; FPG, fasting plasma glucose; FPI, fasting plasma insulin; HOMA, homeostasis model assessment; ISI, insulin sensitivity index; LD, linkage disequilibrium; MAF, minor allele frequency; OGTT, oral glucose tolerance test; OR, odds ratio; PAR, population-attributable risk; SNP, single-nucleotide polymorphism; *TCF7L2*, transcription factor 7-like 2; T2D, type 2 diabetes.

JCEM is published monthly by The Endocrine Society (<http://www.endo-society.org>), the foremost professional society serving the endocrine community.

**TABLE 1.** Clinical characteristics of study populations

|                           | Controls<br>(n = 419) | Diabetics<br>(n = 433) | Family<br>(n = 450) |
|---------------------------|-----------------------|------------------------|---------------------|
| Male (%)                  | 40                    | 38                     | 39                  |
| Age (yr)                  | 40.6 ± 10.4           | 39.4 ± 8.5             | 46.5 ± 14.5         |
| Duration of diabetes (yr) |                       | 8.1 ± 7.6              | 6.6 ± 7.6           |
| BMI (kg/m <sup>2</sup> )  | 22.5 ± 3.2            | 25.8 ± 4.7             | 26.5 ± 4.4          |
| Diabetes (%)              | 0                     | 100                    | 59                  |

### Clinical studies

All subjects underwent detailed clinical investigation as described previously (17, 19). Obesity was defined as body mass index (BMI) 25 kg/m<sup>2</sup> or greater using the Asian criteria (20). A fasting blood sample was collected for measurement of plasma glucose and insulin (FPI). All family members and 295 controls who had no history of diabetes underwent a 75-g oral glucose tolerance test (OGTT). Three fasting blood samples collected at 5-min intervals were assessed for mean FPG and FPI. Blood samples were also collected at 15, 30, 60, and 120 min during OGTT for measurement of plasma glucose and insulin. Using the homeostasis model assessment (HOMA), HOMA insulin resistance index was assessed as FPI (milliunits per liter) × FPG (millimoles per liter)/

22.5, and HOMA of β-cell function was assessed as FPI × 20/(FPG – 3.5) (21). Using the OGTT data, insulinogenic index, a measure of early phase insulin secretion, was assessed as (insulin 30 min – 0 min)/(glucose 30 min – 0 min) (22). Data were discarded if glucose or insulin levels at 30 min were less than that of the fasting levels. Insulin sensitivity index (ISI) was assessed as 10,000/square root of [(FPG × FPI) × (mean glucose × mean insulin during OGTT)]. Insulin disposition index was assessed as ISI × insulinogenic index/100 (23).

### Genotyping

We genotyped 22 SNPs that span 2 kb upstream and downstream of TCF7L2 [chromosome 10: 114,698,200 to 114,918,057 bp; HapMap release 20 (Jan. 2006), NCBI Build 35; National Center for Biotechnology Information, Bethesda, MD]. Twenty tagging SNPs were selected from the Phase II HapMap Han Chinese in Beijing, China (CHB) population using Haploview (version 3.32) based on r<sup>2</sup> greater than 0.64 and minor allele frequency (MAF) 0.05 or greater (24). These tagging SNPs were able to capture 49 of 58 (84%) common SNPs at r<sup>2</sup> greater than 0.64 or 71% of common SNPs at r<sup>2</sup> greater than 0.8. Two additional SNPs (rs7903146 and rs11196205) were also genotyped for replication study (1) despite their low frequencies in the HapMap CHB population. All SNPs were genotyped using primer extension of multiplex products with detection

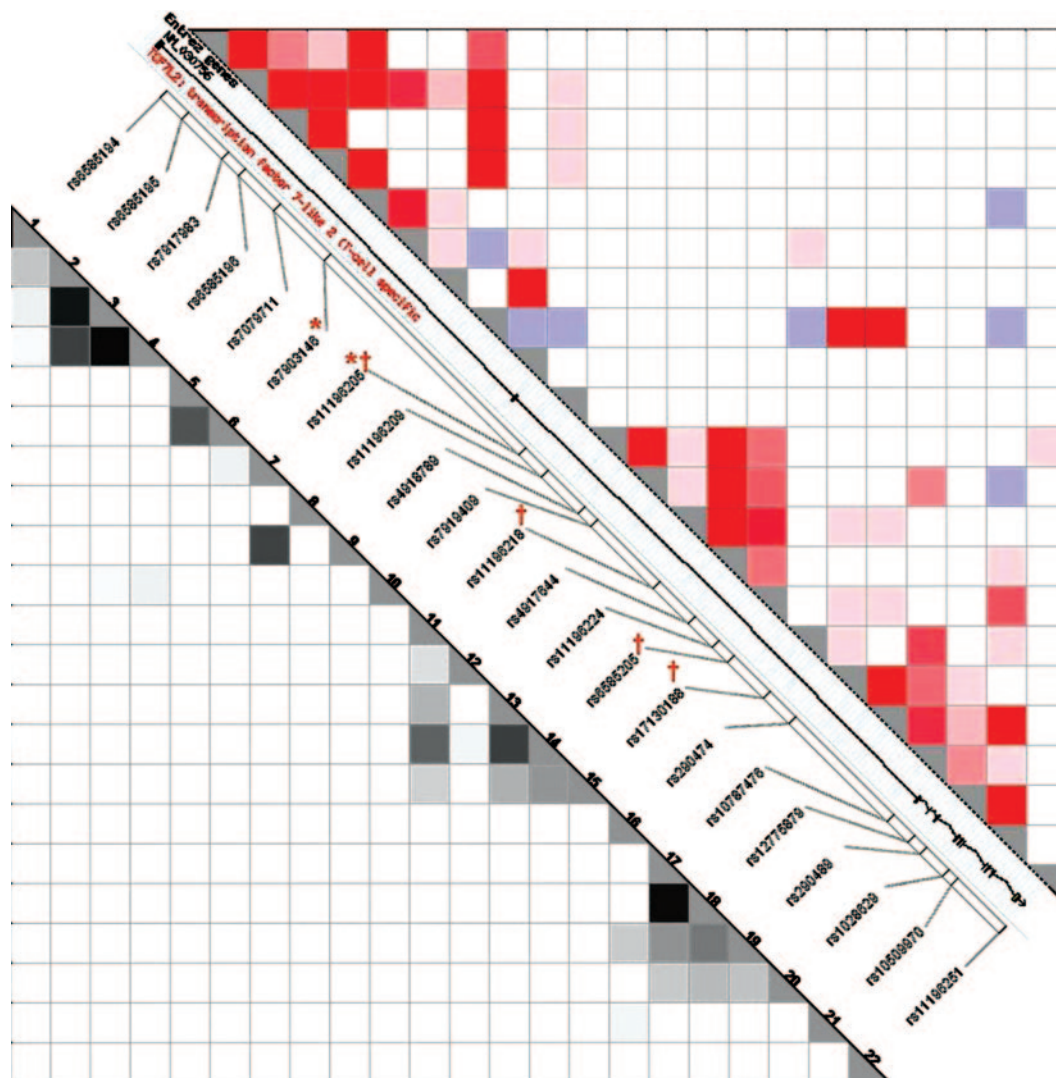

**FIG. 1.** Structure of TCF7L2 gene and the location of SNPs studied. Pairwise LDs among SNPs are indicated in upper block (D') and lower block (r<sup>2</sup>). Increased color intensity represents increased degree of LD as implemented in Haploview. \*, SNPs showing significant association to T2D in study by Grant et al. (1). †, SNPs showing significant association to T2D in the present case-control study.

**TABLE 2.** Allelic association for T2D for 22 tagging SNPs in the *TCF7L2* gene in case-control sample

| SNP               | Chromosome 10 position | <i>TCF7L2</i> region | Major/minor allele | Minor allele frequency |                     | OR (95% CI)             | <i>P</i>     |
|-------------------|------------------------|----------------------|--------------------|------------------------|---------------------|-------------------------|--------------|
|                   |                        |                      |                    | Controls (n = 419)     | Diabetics (n = 433) |                         |              |
| rs6585194         | 114707461              | Intron 3             | C/G                | 0.302                  | 0.288               | 0.93 (0.75–1.16)        | 0.536        |
| rs6585195         | 114712944              | Intron 3             | C/G                | 0.352                  | 0.372               | 1.09 (0.89–1.34)        | 0.41         |
| rs7917983         | 114722872              | Intron 3             | C/T                | 0.352                  | 0.308               | 0.82 (0.67–1.01)        | 0.06         |
| rs6585196         | 114727040              | Intron 3             | T/C                | 0.330                  | 0.305               | 0.89 (0.72–1.09)        | 0.264        |
| rs7079711         | 114735778              | Intron 3             | G/A                | 0.023                  | 0.034               | 1.51 (0.84–2.7)         | 0.168        |
| rs7903146         | 114748339              | Intron 3             | C/T                | 0.024                  | 0.030               | 1.27 (0.71–2.29)        | 0.424        |
| <b>rs11196205</b> | <b>114797037</b>       | <b>Intron 4</b>      | <b>G/C</b>         | <b>0.013</b>           | <b>0.028</b>        | <b>2.11 (1.04–4.26)</b> | <b>0.038</b> |
| rs11196209        | 114802717              | Intron 4             | G/A                | 0.025                  | 0.020               | 0.79 (0.41–1.5)         | 0.47         |
| rs4918789         | 114811797              | Intron 4             | T/G                | 0.019                  | 0.034               | 1.8 (0.98–3.31)         | 0.06         |
| rs7919409         | 114814966              | Intron 4             | T/C                | 0.254                  | 0.262               | 1.05 (0.84–1.3)         | 0.687        |
| <b>rs11196218</b> | <b>114830484</b>       | <b>Intron 4</b>      | <b>G/A</b>         | <b>0.285</b>           | <b>0.219</b>        | <b>0.7 (0.56–0.88)</b>  | <b>0.002</b> |
| rs4917644         | 114839389              | Intron 4             | C/T                | 0.063                  | 0.047               | 1.3 (0.96–1.12)         | 0.157        |
| rs11196224        | 114845387              | Intron 4             | C/T                | 0.281                  | 0.265               | 0.92 (0.74–1.14)        | 0.454        |
| <b>rs6585205</b>  | <b>114849154</b>       | <b>Intron 4</b>      | <b>G/T</b>         | <b>0.441</b>           | <b>0.379</b>        | <b>0.78 (0.64–0.94)</b> | <b>0.01</b>  |
| <b>rs17130188</b> | <b>114858152</b>       | <b>Intron 4</b>      | <b>T/C</b>         | <b>0.497</b>           | <b>0.561</b>        | <b>1.29 (1.06–1.57)</b> | <b>0.011</b> |
| rs290474          | 114864363              | Intron 4             | G/A                | 0.102                  | 0.128               | 1.3 (0.96–1.76)         | 0.095        |
| rs10787476        | 114888904              | Intron 4             | A/C                | 0.214                  | 0.249               | 1.21 (0.97–1.52)        | 0.095        |
| rs12775879        | 114894191              | Intron 4             | T/G                | 0.222                  | 0.242               | 1.12 (0.89–1.4)         | 0.336        |
| rs290489          | 114897045              | Intron 4             | G/A                | 0.284                  | 0.306               | 1.11 (0.9–1.37)         | 0.312        |
| rs1028629         | 114902646              | Intron 10            | C/T                | 0.179                  | 0.166               | 0.91 (0.71–1.17)        | 0.467        |
| rs10509970        | 114904903              | Intron 10            | T/G                | 0.037                  | 0.048               | 1.31 (0.81–2.1)         | 0.27         |
| rs11196251        | 114916780              | 3' to gene           | C/T                | 0.354                  | 0.374               | 1.09 (0.89–1.33)        | 0.406        |

Chromosome position and allele nomenclature are indicated using NCBI dbSNP build 35. OR and 95% CI are shown for T2D association respective to the minor allele. SNPs with significant association ( $P < 0.05$ ) were in *bold*.

by matrix-assisted laser desorption ionization-time of flight mass spectroscopy using a MassARRAY platform (Sequenom, San Diego, CA). The genotyping was performed by the Genome Research Centre at the University of Hong Kong. The overall genotype call rate was 97%, and the concordance rate based on 108 blind duplicate comparisons for each SNP was 99.6%. There was no significant departure from Hardy-Weinberg equilibrium for all SNPs in the normal controls ( $P > 0.05$ ) as assessed by  $\chi^2$  test. Mendelian inconsistencies were identified and removed in 0.03% of the family data using PEDCHECK (version 1.1; <http://watson.hgen.pitt.edu/register/docs/pedcheck.html>) (25).

### Statistical analyses

Continuous data were transformed by natural logarithm if necessary and expressed as mean  $\pm$  SD or geometric mean [95% confidence intervals (CIs)]. Allele and genotype frequencies for cases and controls were compared using  $\chi^2$  test. Odds ratio (OR) with 95% CI are presented. Haplotypes with frequencies greater than 5% in case-control study were compared using haplotype-specific test implemented in Haploview (24). Logistic regression for the four associated SNPs with T2D status was performed to assess independence of effect on T2D under an additive genetic model (except rs11196205 under a dominant model). Breslow-Day test was performed to assess homogeneity of ORs in subset analyses. For the family study, FBAT (version 1.7.2; Department of Biostatistics, Department of Environmental Health, Harvard School of Public Health; <http://www.biostat.harvard.edu/~fbat/default.html>) (26) was used to test for the association between SNPs or haplotypes and T2D under an additive genetic model with the  $-e$  option, which empirically estimated the variance. Quantitative traits were compared for SNPs under an additive model by linear regression with or without adjustment for age and gender. Population-attributable risk (PAR) was calculated as  $PAR = (X - 1)/X$ . Assuming a multiplicative model,  $X = (1 - f)^2 + 2f(1 - f)\gamma + f^2\gamma^2$ , where  $\gamma$  is the estimated OR and  $f$  is the frequency of risk allele. All statistical tests were performed by SAS (version 9.1; SAS Institute, Cary, NC) unless specified otherwise. A  $P < 0.05$  was considered significant (two tailed). Given the presence of LD among the SNPs, 10,000 permutations of case-control labels were used to assess empirical  $P$  values for multiple allelic tests using Haploview.

## Results

### Case-control association

We genotyped 22 tagging SNPs spanning across *TCF7L2* as shown in Fig. 1. Previous study demonstrated that T2D-associated SNPs were located within a 92.1-kb LD block (chromosome 10: 114,723–114,815 kb, NCBI Build 35) (1). Whereas the SNPs in this block are relatively common in Utah residents with ancestry from Northern and Western Europe and Yoruba in Ibadan, Nigeria populations from HapMap, they are relatively rare (frequencies  $< 5\%$ ) in the CHB population, possibly due to positive selection at this region (27). We genotyped two SNPs (rs7903146 and rs11196205) within this block and found they were rare in our controls (MAF = 0.024 and 0.013, respectively), consistent with the HapMap CHB and Japanese populations (MAF = 0.02–0.04 and 0.03–0.05, respectively) (5, 6).

Table 2 summarizes the results of case-control allelic association for T2D with 22 tagging SNPs for *TCF7L2*. Whereas the previously reported at-risk C allele of rs11196205 was significantly associated with increased risk for T2D (OR 2.11, 95% CI 1.04–4.26), the T allele of rs7903146 was not significantly associated with T2D (OR 1.27, 95% CI 0.71–2.29). Interestingly, three additional common SNPs (rs11196218, rs6585205, and rs17130188) at intron 4 in adjacent LD blocks also demonstrated significant association to T2D (OR 1.29–1.43,  $P = 0.002$ –0.011, Table 2). However, only rs11196218 remained significant (empirical  $P = 0.044$ ) after correction for multiple testing of 22 SNPs by permutations. Haplotype analyses of the three associated common SNPs (rs11196218, rs6585205, and rs17130188) revealed similar effect size, compared with the single SNP associations (Table 3). Only haplotypes constructed from at-risk (GGC) and protective (ATT) alleles conferred increased (OR



**TABLE 3.** Haplotype association of three associated SNPs (rs11196218, rs6585205, and rs17130188) for T2D in case-control sample

| Haplotype | Frequency in controls | Frequency in diabetics | OR (95% CI)      | <i>P</i> |
|-----------|-----------------------|------------------------|------------------|----------|
| GGC       | 0.400                 | 0.476                  | 1.36 (1.12–1.65) | 0.002    |
| ATT       | 0.226                 | 0.170                  | 0.70 (0.55–0.89) | 0.004    |
| GGT       | 0.153                 | 0.140                  | 0.90 (0.69–1.17) | 0.433    |
| GTT       | 0.128                 | 0.137                  | 1.09 (0.82–1.44) | 0.559    |

Common haplotypes (frequency > 0.05) were tested using Haploview. GGC and ATT are constructed from the risk and protective alleles for rs11196218, rs6585205, and rs17130188, respectively.

1.36, 95% CI 1.12–1.65) and decreased risk (OR 0.70, 95% CI 0.55–0.89), respectively, for T2D. Logistic regression of T2D with all four associated SNPs showed that rs11196218 G allele and rs11196205 C allele tended to confer independent risk for T2D (adjusted OR 1.45 and 1.96, *P* = 0.022 and 0.096, respectively) whereas the association with rs6585205 and rs17130188 was not significant after adjustment (*P* = 0.962 and 0.306, respectively). We further examined the effects of gender and obesity status on the association results for the two independent associated SNPs rs11196218 and rs11196205. We found no significant heterogeneity of ORs between men and women [OR (95% CI) = 1.67 (1.17–2.37) vs. 1.27 (0.94–1.71) for rs11196218; 1.57 (0.67–3.68) vs. 4.69 (1.02–21.5) for rs11196205]. We also found no significant heterogeneity of ORs by comparing non-obese control subjects with either nonobese or obese diabetic patients [OR (95% CI) = 1.47 (1.09–1.98) vs. 1.32 (0.99–1.76) for rs11196218 and 2.39 (1.00–5.75) vs. 2.22 (0.92–5.34) for rs11196205] (supplementary Table 1, published as supplemental data on The Endocrine Society's Journals Online Web site at <http://endo.endojournals.org>). The ORs for these two SNPs were also similar before and after adjustment for BMI by logistic regression (data not shown).

#### Family-based association

We assessed the evidence of association of *TCF7L2* SNPs and haplotypes with T2D in our families using FBAT (Table 4). rs11196205 was too rare and ignored for analysis. Two of the three risk alleles in the case-control studies were also replicated or with trend of replication for association with T2D in the family study (*P* = 0.041 for rs11196218, *P* = 0.094 for rs6585205). Haplotype analysis with rs11196218 and rs6585205 showed similar results with the AT haplotype conferred protective effect for T2D (*P* = 0.029).

#### Metabolic trait association in normal controls

We also examined the association of the two significant SNPs (rs11196205 and rs11196218) with obesity index (as measured

by BMI), insulin sensitivity (HOMA insulin resistance index, ISI), and insulin secretion (HOMA of  $\beta$ -cell function, insulinogenic index, insulin disposition index) at fasting or postprandial status. No association was observed for any of these metabolic traits with the two SNPs with or without adjustment for age and gender effects (supplemental Table 2).

## Discussion

In the present study, we replicated previous findings of association of SNP (rs11196205) within a 92.1-kb LD block of *TCF7L2* with T2D using both case-control and family samples in our Chinese population. We further identified an additional SNP (rs11196218) downstream of the rs11196205 containing LD block that independently confer the risk for T2D (supplemental Fig. 1, published as supplemental data on The Endocrine Society's Journals Online web site at <http://endo.endojournals.org>).

In contrast to populations of European and African ancestries, SNPs within the large LD block with reported associations for rs11196205 (supplementary Figure 1) were rare in Chinese. Two recent case-control studies on more than 2000 Japanese subjects investigated SNPs within this LD block and found trend or significant association of rs11196205 and rs7903146 to T2D (5, 6). Notably the frequencies as well as the effect sizes of risk alleles for rs11196205 (C) and rs7903146 (T) in our Chinese population (OR = 2.11 and 1.27, respectively; Table 1) were consistent with findings from the Japanese studies (OR 1.21–1.37 and 1.30–1.69, respectively) (5, 6). Assuming a risk allele frequency of 0.04 and genotypic relative risk of 1.5 in multiplicative model using the Japanese data for rs7903146 (5, 6), 1650 case-control samples will be required to attain 80% power at  $\alpha$ -level of 0.05 (28). The nonsignificant finding of rs7903146 in this study was probably due to insufficient power. In addition, the low risk allele frequency also led to the lower PAR of rs11196205 (3%) in our population, compared with European populations (PAR = 17–28%) (1). On the other hand, an additional SNP at 3' of rs11196205, rs11196218 with higher risk allele frequency of 0.72 (Table 1), is likely to have higher impact on T2D in Chinese (PAR = 42%). A recent study in Mexican-Americans found that additional SNPs at 5' and 3' of the LD block also showed independent association to T2D (8).

We did not observe any association of the two T2D-related SNPs (rs11196205 and rs11196218) with the obesity, insulin sensitivity, and secretion traits in our normal controls (supplementary Table 2), as found in some studies (2, 3, 9, 12–15). Assuming the effect size observed from 995 Europeans on the insulinogenic index, which indicates early-phase insulin secretion (9), and assume a risk allele frequency of 0.05 for rs11196205 using data from the Japanese studies (5, 6), 28,900 samples will be required to attain 80% power at  $\alpha$ -level of 0.05 using ANOVA

**TABLE 4.** Association of *TCF7L2* SNPs and haplotypes with T2D in 142 families using FBAT with the additive genetic model

| Marker                | Allele/haplotype frequency | Direction of transmission | <i>P</i> |
|-----------------------|----------------------------|---------------------------|----------|
| rs11196218            | G: 0.701                   | Increased                 | 0.041    |
| rs6585205             | G: 0.554                   | Increased                 | 0.094    |
| rs17130188            | C: 0.545                   | Increased                 | 0.253    |
| Haplotype             |                            |                           |          |
| rs11196218, rs6585205 | GG: 0.569                  | Increased                 | 0.154    |
|                       | AT: 0.247                  | Decreased                 | 0.029    |
|                       | GT: 0.172                  | Increased                 | 0.414    |

(29). This may partly explain the failure to detect quantitative traits association in our Chinese population.

Collectively, our data replicate previous findings by Grant *et al.* (1) and others and suggest that the causal variant(s) that confer risk for T2D in different populations including Chinese may reside within or adjacent to the originally reported LD block. Further investigation of more regions at this gene is warranted to elucidate the causal variants for T2D in this and other populations.

### Acknowledgments

We thank Ms. Cherry Chiu and Dr. Ying Wang for recruitment of study subjects; Mr. Lunan Chow, Mr. Kevin Yu, Ms. Janice Ho, and Ms. Patty Tse for computing and laboratory support; the Centre for Clinical Trials and Information Technology Services Centre for support of computing resources; all nursing and medical staff at the Prince of Wales Hospital Diabetes and Endocrine Centre for their dedication and professionalism; Dr. William Mak and Ms. Phoebe Ng (Genome Research Centre of the University of Hong Kong) for genotyping support; and all study subjects participating in this study.

Received April 17, 2007. Accepted June 26, 2007.

Address all correspondence and requests for reprints to: Maggie C. Y. Ng, Ph.D., Department of Medicine and Therapeutics, The Chinese University of Hong Kong, Prince of Wales Hospital, Shatin, Hong Kong SAR, China. E-mail: maggieng@cuhk.edu.hk.

This work was supported by the Hong Kong Innovation and Technology Support Fund (ITS/33/00) and the Research Grants Council Central Allocation Scheme (CUHK 1/04C).

Disclosure Information: All authors have nothing to declare.

### References

- Grant SF, Thorleifsson G, Reynisdottir I, Benediktsson R, Manolescu A, Sainz J, Helgason A, Stefansson H, Emilsson V, Helgadóttir A, Styrkarsdóttir U, Magnusson KP, Walters GB, Palsdóttir E, Jonsdóttir T, Gudmundsdóttir T, Gylfason A, Saemundsdóttir J, Wilensky RL, Reilly MP, Rader DJ, Bagger Y, Christiansen C, Gudnason V, Sigurdsson G, Thorsteinsdóttir U, Gulcher JR, Kong A, Stefansson K 2006 Variant of transcription factor 7-like 2 (*TCF7L2*) gene confers risk of type 2 diabetes. *Nat Genet* 38:320–323
- Cauchi S, Meyre D, Choquet H, Dina C, Born C, Marre M, Balkau B, Froguel P 2006 *TCF7L2* Variation predicts hyperglycemia incidence in a French general population: the data from an Epidemiological Study on the Insulin Resistance Syndrome (DESIR) study. *Diabetes* 55:3189–3192
- Damcott CM, Pollin TI, Reinhart LJ, Ott SH, Shen H, Silver KD, Mitchell BD, Shuldiner AR 2006 Polymorphisms in the transcription factor 7-like 2 (*TCF7L2*) gene are associated with type 2 diabetes in the Amish: replication and evidence for a role in both insulin secretion and insulin resistance. *Diabetes* 55:2654–2659
- Groves CJ, Zeggini E, Minton J, Frayling TM, Weedon MN, Rayner NW, Hitman GA, Walker M, Wiltshire S, Hattersley AT, McCarthy MI 2006 Association analysis of 6,736 U.K. subjects provides replication and confirms *TCF7L2* as a type 2 diabetes susceptibility gene with a substantial effect on individual risk. *Diabetes* 55:2640–2644
- Hayashi T, Iwamoto Y, Kaku K, Hirose H, Maeda S 2007 Replication study for the association of *TCF7L2* with susceptibility to type 2 diabetes in a Japanese population. *Diabetologia* 50:980–984
- Horikoshi M, Hara K, Ito C, Nagai R, Froguel P, Kawakami T 2007 A genetic variation of the transcription factor 7-like 2 gene is associated with risk of type 2 diabetes in the Japanese population. *Diabetologia* 50:747–751
- Humphries SE, Gable D, Cooper JA, Ireland H, Stephens JW, Hurel SJ, Li KW, Palmen J, Miller MA, Cappuccio FP, Elkeles R, Godsland I, Miller GJ, Talmud PJ 2006 Common variants in the *TCF7L2* gene and predisposition to type 2 diabetes in U.K. European Whites, Indian Asians and Afro-Caribbean men and women. *J Mol Med* 84:1–10
- Lehman DM, Hunt KJ, Leach RJ, Hamlington J, Arya R, Abboud HE, Dugirala R, Blangero J, Goring HH, Stern MP 2007 Haplotypes of transcription factor 7-like 2 (*TCF7L2*) gene and its upstream region are associated with type 2 diabetes and age of onset in Mexican Americans. *Diabetes* 56:389–393
- Saxena R, Gianniny L, Burt NP, Lyssenko V, Guducchi C, Sjogren M, Florez JC, Almgren P, Isomaa B, Orho-Melander M, Lindblad U, Daly MJ, Tuomi T, Hirschhorn JN, Ardlie KG, Groop LC, Althuler D 2006 Common single nucleotide polymorphisms in *TCF7L2* are reproducibly associated with type 2 diabetes and reduce the insulin response to glucose in nondiabetic individuals. *Diabetes* 55:2890–2895
- Scott LJ, Bonnycastle LL, Willer CJ, Sprau AG, Jackson AU, Narisu N, Duren WL, Chines PS, Stringham HM, Erdos MR, Valle TT, Tuomilehto J, Bergman RN, Mohlke KL, Collins FS, Boehnke M 2006 Association of transcription factor 7-like 2 (*TCF7L2*) variants with type 2 diabetes in a Finnish sample. *Diabetes* 55:2649–2653
- Sladek R, Rocheleau G, Rung J, Dina C, Shen L, Serre D, Boutin P, Vincent D, Belisle A, Hadjadj S, Balkau B, Heude B, Charpentier G, Hudson TJ, Montpetit A, Pshezhetsky AV, Prentki M, Posner BI, Balding DJ, Meyre D, Polychronakos C, Froguel P 2007 A genome-wide association study identifies novel risk loci for type 2 diabetes. *Nature* 445:881–885
- Cauchi S, Meyre D, Dina C, Choquet H, Samson C, Gallina S, Balkau B, Charpentier G, Pattou F, Stetsyuk V, Scharfmann R, Staels B, Fruhbeck G, Froguel P 2006 Transcription factor *TCF7L2* genetic study in the French population: expression in human  $\beta$ -cells and adipose tissue and strong association with type 2 diabetes. *Diabetes* 55:2903–2908
- Melzer D, Murray A, Hurst AJ, Weedon MN, Bandinelli S, Corsi AM, Ferrucci L, Paolisso G, Guralnik JM, Frayling TM 2006 Effects of the diabetes linked *TCF7L2* polymorphism in a representative older population. *BMC Med* 4:34
- Florez JC, Jablonski KA, Bayley N, Pollin TI, de Bakker PI, Shuldiner AR, Knowler WC, Nathan DM, Althuler D 2006 *TCF7L2* polymorphisms and progression to diabetes in the Diabetes Prevention Program. *N Engl J Med* 355:241–250
- Munoz J, Lok KH, Gower BA, Fernandez JR, Hunter GR, Lara-Castro C, De Luca M, Garvey WT 2006 Polymorphism in the transcription factor 7-like 2 (*TCF7L2*) gene is associated with reduced insulin secretion in nondiabetic women. *Diabetes* 55:3630–3634
- Wang J, Kuusisto J, Vanttinen M, Kuulasmaa T, Lindstrom J, Tuomilehto J, Uusitupa M, Laakso M 2007 Variants of transcription factor 7-like 2 (*TCF7L2*) gene predict conversion to type 2 diabetes in the Finnish Diabetes Prevention Study and are associated with impaired glucose regulation and impaired insulin secretion. *Diabetologia* 50:1192–1200
- Yang X, So WY, Kong AP, Ho CS, Lam CW, Stevens RJ, Lyu RR, Yin DD, Cockram CS, Tong PC, Wong V, Chan JC 2007 Development and validation of stroke risk equation for Hong Kong Chinese patients with type 2 diabetes: the Hong Kong Diabetes Registry. *Diabetes Care* 30:65–70
- Ng MCY, So WY, Cox NJ, Lam VKL, Cockram CS, Critchley JAJH, Bell GI, Chan JCN 2004 Genome-wide scan for type 2 diabetes loci in Hong Kong Chinese and confirmation of a susceptibility locus on chromosome 1q21–q25. *Diabetes* 53:1609–1613
- Ng MCY, So WY, Lam VKL, Cockram CS, Bell GI, Cox NJ, Chan JCN 2004 Genome-wide scan for metabolic syndrome and related quantitative traits in Hong Kong Chinese and confirmation of a susceptibility locus on chromosome 1q21–q25. *Diabetes* 53:2676–2683
- International Obesity Task Force 2000 The Asia-Pacific perspective: redefining obesity and its treatment. Geneva: Western Pacific Region, World Health Organization
- Matthews RD, Hosker JP, Rudenski AS, Naylor BA, Treacher DF, Turner RC 1985 Homeostasis model assessment: insulin resistance and  $\beta$  cell function from fasting plasma glucose and insulin concentrations in man. *Diabetologia* 28:412–419
- Phillips DIW, Clark PM, Hales CN, Osmond C 1994 Understanding oral glucose tolerance: comparison of glucose or insulin measurements during the oral glucose tolerance test with specific measurements of insulin resistance and insulin secretion. *Diabet Med* 11:286–292
- Matsuda M, DeFronzo RA 1999 Insulin sensitivity indices obtained from oral glucose tolerance testing: comparison with the euglycemic insulin clamp. *Diabetes Care* 22:1462–1470
- Barrett JC, Fry B, Maller J, Daly MJ 2005 Haploview: analysis and visualization of LD and haplotype maps. *Bioinformatics* 21:263–265
- O'Connell JR, Weeks DE 1998 PedCheck: a program for identification of genotype incompatibilities in linkage analysis. *Am J Hum Genet* 63:259–266
- Lake SL, Blacker D, Laird NM 2000 Family-based tests of association in the presence of linkage. *Am J Hum Genet* 67:1515–1525
- Helgason A, Palsson S, Thorleifsson G, Grant SF, Emilsson V, Gunnarsdóttir S, Adeyemo A, Chen Y, Chen G, Reynisdóttir I, Benediktsson R, Hinney A, Hansen T, Andersen G, Borch-Johnsen K, Jorgensen T, Schafer H, Faruque M, Doumatey A, Zhou J, Wilensky RL, Reilly MP, Rader DJ, Bagger Y, Christiansen C, Sigurdsson G, Hebebrand J, Pedersen O, Thorsteinsdóttir U, Gulcher JR, Kong A, Rotimi C, Stefansson K 2007 Refining the impact of *TCF7L2* gene variants on type 2 diabetes and adaptive evolution. *Nat Genet* 39:218–225
- Purcell S, Cherny SS, Sham PC 2003 Genetic power calculator: design of linkage and association genetic mapping studies of complex traits. *Bioinformatics* 19:149–150
- Faul F, Erdfelder E, Lang A-G, Buchner A 2007 G\*Power 3: a flexible statistical power analysis program for the social, behavioral, and biomedical sciences. *Behav Res Methods*, in press
